# Supplementary material for: Self-Directed Learning and Feedback with Blended Training in Paediatric Emergencies
Source: Research Square preprint supplement (doi:10.21203/rs.3.rs-7849481/v1), 2025-12-03
Supplement: Supplementary file 1 [file 3ae6d5efc9d1f3517b6db395.docx]

| Please answer each item promptly by providing your immediate response. Circle the appropriate code number to show your response to the training.  **Assignment** refers to the online Paediatric training programme (this included the reading of the PowerPoint presentations, answering of questions and handing in of answer lists on time).  **Course** refers to the entire Paediatric internship programme |  |  |  |  |  |
| --- | --- | --- | --- | --- | --- |
| **1 Amount and distribution of study effort** | Strongly DISAGREE | DISAGREE | UNSURE | AGREE | Strongly AGREE |
| 1.1 I did the same amount of reading on paediatrics each week, regardless of whether an assignment was due or not. | 1 | 2 | 3 | 4 | 5 |
| 1.2 I could be quite selective about what I focus on in the assignments and still answer questions | 5 | 4 | 3 | 2 | 1 |
| 1.3 I only read about aspects covered by questions in the assignment. | 5 | 4 | 3 | 2 | 1 |
| 1.4 I had to read paediatrics extensively if I wanted to complete the assignment | 1 | 2 | 3 | 4 | 5 |
| 1.5 In this course, it is possible to complete the assignments without reading the coursework. | 5 | 4 | 3 | 2 | 1 |
| 1.6 In the days when the answer sheets were due, I put in many more reading. | 5 | 4 | 3 | 2 | 1 |
| **2 Assignments and learning** |  |  |  |  |  |
| 2.1 Tackling the assignments really makes me think. | 1 | 2 | 3 | 4 | 5 |
| 2.2 I learn more from doing the assignments than from working. | 1 | 2 | 3 | 4 | 5 |
| 2.3 In completing the assignments, you can get away with not understanding  Paediatrics | 5 | 4 | 3 | 2 | 1 |
| 2.4 The assignments give very clear instructions about what you are expected  To do. | 1 | 2 | 3 | 4 | 5 |
| 2.5 When I tackle an assignment, it is not at all clear what would count as a  Successful answer. | 5 | 4 | 3 | 2 | 1 |
| 2.6 The assignments are not very challenging. | 5 | 4 | 3 | 2 | 1 |
| **3 Quantity and timing of feedback** |  |  |  |  |  |
| 3.1 In this course, I get plenty of feedback on how I am doing. | 1 | 2 | 3 | 4 | 5 |
| 3.2 The feedback comes back very quickly. | 1 | 2 | 3 | 4 | 5 |
| 3.3There is hardly any feedback on my assignments when I get them back. | 5 | 4 | 3 | 2 | 1 |
| 3.4 When I get things wrong or misunderstand them, I don’t receive much  Guidance on what to do about it. | 5 | 4 | 3 | 2 | 1 |
| 3.5 I would learn more if I received more feedback. | 5 | 4 | 3 | 2 | 1 |
| 3.6 Whatever feedback I get comes too late to be useful. | 5 | 4 | 3 | 2 | 1 |

| **4. Quality of feedback** | Strongly DIASGAREE | DISAGREE | UNSURE | AGREE | Strongly AGREE |
| --- | --- | --- | --- | --- | --- |
| 4.1 The feedback mainly tells me how well I am doing in relation to others. | 5 | 4 | 3 | 2 | 1 |
| 4.2The feedback helps me to understand things better. | 1 | 2 | 3 | 4 | 5 |
| 4.3The feedback shows me how to do better next time. | 1 | 2 | 3 | 4 | 5 |
| 4.4 Once I have read the feedback, I understand where I was deficient in knowledge | 1 | 2 | 3 | 4 | 5 |
| 4.5 I don’t understand some of the feedback. | 5 | 4 | 3 | 2 | 1 |
| 4.6 I can seldom see from the feedback what I need to do to improve. | 5 | 4 | 3 | 2 | 1 |
| **5 What you do with the feedback** |  |  |  |  |  |
| 5.1 I review the feedback carefully and try to understand what the feedback  Is saying. | 1 | 2 | 3 | 4 | 5 |
| 5.2 I use the feedback to go back over what I have done in the assignment. | 1 | 2 | 3 | 4 | 5 |
| 5.3The feedback does not help me with any subsequent assignments. | 5 | 4 | 3 | 2 | 1 |
| 5.4 The feedback prompts me to go back over the material covered earlier in  The course. | 1 | 2 | 3 | 4 | 5 |
| 5.5 I do not use the feedback for clinical care. | 5 | 4 | 3 | 2 | 1 |
| 5.6 I tend to only focus on whether I get signed up or not | 5 | 4 | 3 | 2 | 1 |

Comments you would like to make about the way the assignments affected your learning on the course

**Demographic details: Please circle /fill in where applicable**

1. Male / Female/other
2. Age in years ___________________
3. Internship year first year / Second year
4. Undergraduate university ___________________
5. Date of start of Paediatric internship

| **Open the comments section, requesting your opinions on the online training programme** |
| --- |
| What did you **like** about the online training programme for the paediatric internship at King Edward VIII Hospital? |
| What did you  **not like** about the online training programme for the paediatric internship at King Edward VIII Hospital |
| Any suggestions to improve the paediatric training programme |
